# Supplementary material
Source: publisher figshare collection journal article supplement (https://acs.figshare.com/ndownloader/files/17342336)
Supplement: Supplementary file 1 [file 17342336]

**Supporting Information for:**  
**Non-Resonant Transmission Line Probe for Sensitive  
Interferometric Electron Spin Resonance Detection**

Pragya R. Shrestha<sup>1,2</sup>, Nandita Abhyankar<sup>2,3</sup>, Mark A. Anders<sup>2</sup>, Kin P. Cheung<sup>2</sup>, Robert Gougelet<sup>4</sup>, Jason T. Ryan<sup>2</sup>, Veronika Szalai<sup>2</sup>, and Jason P. Campbell<sup>2,\*</sup>

1.Theiss Research, La Jolla, CA 92037, USA

2. National Institute of Standards and Technology, Gaithersburg, MD 20899, USA

3.Institute for Research in Electronics and Applied Physics, University of Maryland, MD 20742, USA

4.Global Resonance Technologies LLC, Washington DC 20015, USA

***This file includes:***

Transmission Line Equations

Results of finite element simulation done for various transmission line geometries

Time delay in a transmission line

Components used in the ESR setup

Sample holders for liquid samples

Limitations

Figures S1-S5

### Transmission Line Equations

The width of the signal line on the microstrip shown in figure s1 is calculated using the following equations [1, 2],

$$Z_0 = \sqrt{\frac{\mu_0 \epsilon_0}{\epsilon_e}} \frac{1}{C_a} \text{ ohms}$$

$$C_a = \begin{cases} \frac{2\pi\epsilon_0}{\ln(8h/w + w/4h)} & \text{when } \frac{w}{h} \leq 1 \\ \epsilon_0 \left[ \frac{w}{h} + 1.393 + 0.667 \ln \left( \frac{w}{h} + 1.44 \right) \right] & \text{when } \frac{w}{h} > 1 \end{cases}$$

$$\epsilon_r = \frac{\epsilon_r - 1}{2} + \frac{\epsilon_r - 1}{2} \left( 1 + \frac{12h}{w} \right)^{-1/2} + F - 0.217(\epsilon_r - 1) \frac{T}{\sqrt{wh}}$$

$$F = \begin{cases} 0.02(\epsilon_r - 1) \left( 1 - \frac{w}{h} \right)^2 & \text{when } \frac{w}{h} < 1 \\ 0 & \text{when } \frac{w}{h} > 1 \end{cases}$$

When  $0.1 < w/h < 2.0$  and  $1 < \epsilon_r < 15$

$$Z_0 \approx \frac{87}{\sqrt{\epsilon_r + 1.41}} \ln \left( \frac{5.98h}{0.8w + T} \right) \text{ ohms}$$

$\epsilon_r$  = Dielectric constant

$Z_0$  = Characteristic impedance

$\epsilon_0$  = Vacuum permittivity

$\mu_0$  = Vacuum permeability

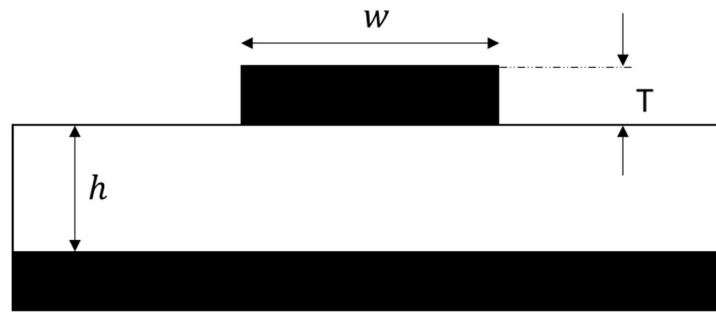

Figure S1: Geometry of the transmission line used for the given equations above.

**Results of finite element simulation done for various transmission line geometries**

| dielectric thickness (mm) | dielectric constant | signal line width (mm) | Metal thickness (mm) | Area (mm <sup>2</sup> ) | Comsol                                                                               |
|---------------------------|---------------------|------------------------|----------------------|-------------------------|--------------------------------------------------------------------------------------|
| 0.76                      | 2                   | 1.92                   | 0.03556              | 0.96                    | 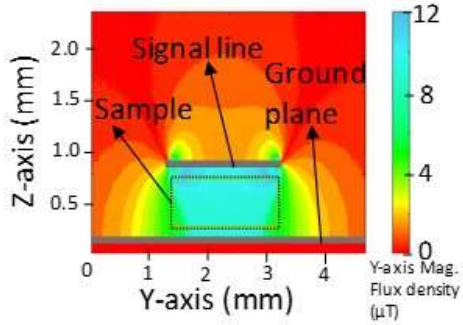   |
| 0.2                       | 2                   | 0.473                  | 0.0355               | 0.07                    |   |
| 0.7                       | 15                  | 0.466                  | 0.0355               | 0.233                   |  |
| 0.2                       | 15                  | 0.1                    | 0.0355               | 0.015                   |  |

***Time delay in a transmission line*** [1].

$$TD = \frac{x\sqrt{\epsilon_r}}{c}$$

*c* = speed of light in vacuum ( $3 \times 10^8$  m/s)

*x* = length of transmission line in m

$\epsilon_r$  = Dielectric constant

*TD* = Timem Delay

### Components used in the ESR setup

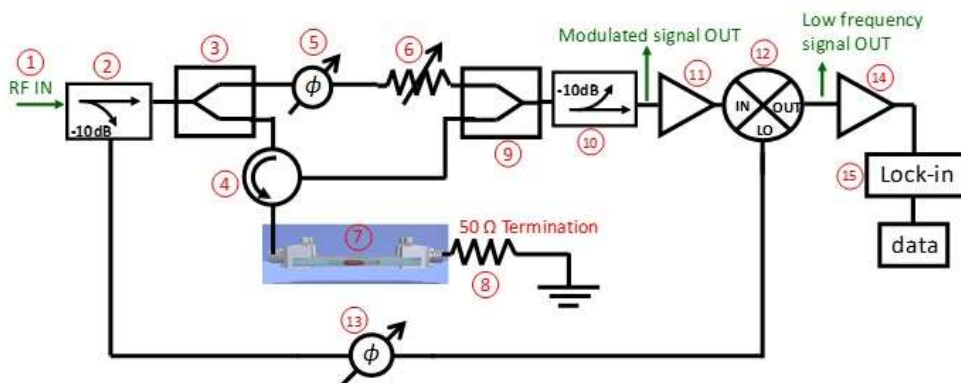

Figure S2: Complete setup for ESR measurement.

List of details of the components shown in Figure S2<sup>1</sup>.

| Number | Component Detail                                                               | Number | Component Detail                                                                                  | Number | Component Detail                                         |
|--------|--------------------------------------------------------------------------------|--------|---------------------------------------------------------------------------------------------------|--------|----------------------------------------------------------|
| 1      | Keysight E8257D, High Power Signal Generator opt. 521, 10 MHz to 20 GHz        | 7      | Transmission line discussed in paper                                                              | 13     | Response microwave phase shifter DC-20 GHz, 53 deg/GHz*  |
| 2      | MECA 10 db directional coupler 780-10-9.700, 50 Watts, 7.000-12.400 GHz        | 8      | Fairview microwave 50 $\Omega$ termination DC-18GHz, 1 watt<br>Not required for transmission mode | 14     | North Hills wide band transformer, ratio 1:5, FSCM 98821 |
| 3      | Meca 802-2-9.700 3 db Power divider/combiner                                   | 9      | Meca 802-2-9.700 3 db Power divider/combiner                                                      | 15     | Stanford SR830 Lock-in                                   |
| 4      | 8.4 GHz-9.7 GHz UTE microwave circulator<br>Not required for transmission mode | 10     | MECA 10 db directional coupler 780-10-9.700, 50 Watts, 7.000-12.400 GHz                           |        |                                                          |
| 5      | Response microwave phase shifter DC-20 GHz, 53 deg/GHz                         | 11     | Miteq low noise amp. gain 50 db AFS43-08501160-09-10P-44                                          |        |                                                          |
| 6      | 50CA12.4-20 Alan Industries, 20 db, 8-12.4 GHz*                                | 12     | Miteq DMO812LW2 Mixer                                                                             |        |                                                          |

\* Passive components rather than voltage-controlled components are preferred and used to avoid loss in signal integrity due to high VSWR (Voltage Standing Wave Ratio) in the latter.

<sup>1</sup> Certain commercial equipment, instruments, or materials are identified in this paper in order to specify the experimental procedure adequately. Such identification is not intended to imply recommendation or endorsement by the NIST nor is it intended to imply that the materials or equipment identified are necessarily the best available for the purpose.

### ***Sample holders for liquid samples***

The sample holder for liquid sample is designed as shown below. The channel is carved in the center layer. It is then sealed with the top and bottom layer with two openings such that liquid can be pipetted in and out of the channel. In principle, this simple liquid cell can easily be modified to include more complicated solution mixing stages.

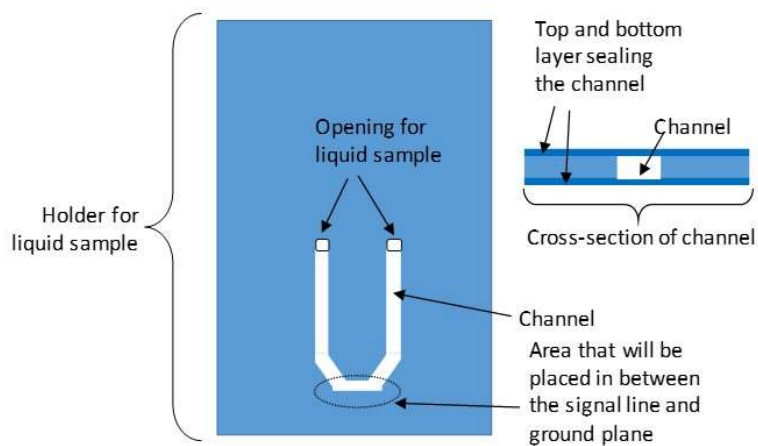

Figure S3: Schematic of a sample holder used for liquid sample.

Sample holder design for a mixing flow-cell.

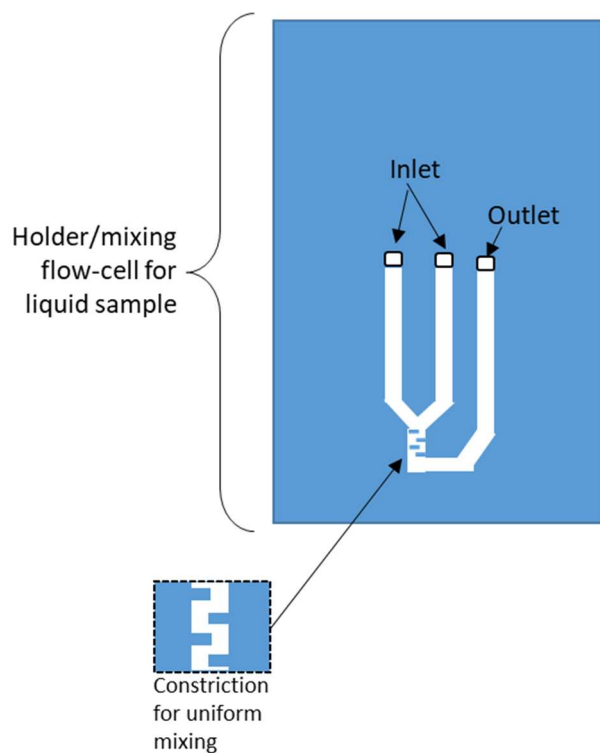

Figure S4: Schematic of a mixing flow-cell on the sample holder, with two inlets and one outlet.

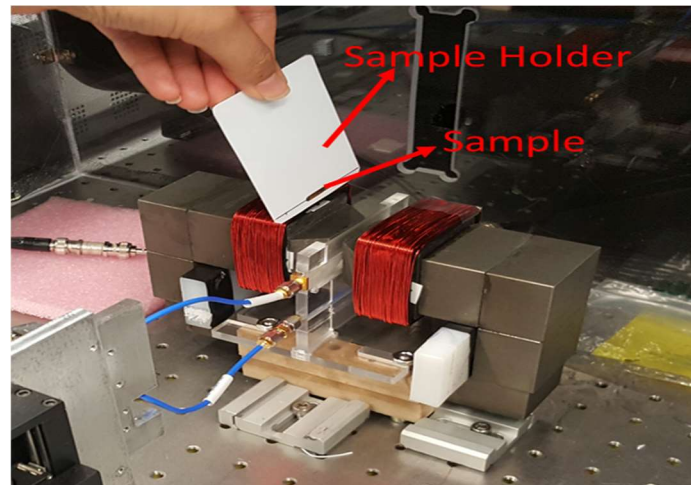

Figure S5: Picture of magnet and transmission line setup where the sample holder is shuttled in and out of the transmission line.

### **Limitations**

As mentioned in the text, the available B1/input microwave power is somewhat limited. This is due to the power handling of the components in the interferometer circuit as well as the chosen geometry of the transmission line probe. For transmission line designs which accommodate thicker samples (larger dielectric thickness), there is a B1 penalty. For designs which accommodate thinner samples (smaller dielectric thickness), there is a potential for a sample volume penalty. As discussed above, the traveling wave nature of the transmission line probe does not restrict sample volume in the X-direction (see figure 1). However, the X-direction is practically limited by B0 uniformity. This can effectively limit the sample volume which can be probed. Also, we again note that the transmission line probe design is dependent on the sample composition (dielectric constant). Thus, if one were measuring a variety of samples with widely varying dielectric constants, several different transmission line probes would need to be used. Lastly, we note that sample misalignment is only a secondary concern. If the sample holder is misaligned or the transmission line probe tolerances result in a loose-fitting sample holder, the sensitivity can be regained by retuning of the interferometer circuit the desired level. If one keeps the interferometric cancellation (monitored by the output power) fixed, then small sample misalignments become unimportant.

### **References**

- [1] S. H. Hall, G. W. Hall, and J. A. McCall, *High speed digital system design : a handbook of interconnect theory and design practices*, New York: Wiley, 2000.
- [2] M. V. Schneider, "Microstrip Lines for Microwave Integrated Circuits," *Bell System Technical Journal*, vol. 48, no. 5, pp. 1421-+, 1969.
